# Supplementary material for: Consumption of Tree Nuts as Snacks Reduces Metabolic Syndrome Risk in Young Adults: A Randomized Trial
Source: MDPI journal article supplement (doi:10.3390/nu15245051), 2023-12-09
Supplement: s1 [file s1]

| Supplemental Table. Changes in Dietary Energy and Nutrient Intakes in Males (n= 36) |                   |                  |         |                   |                 |         |                  |         |
|-------------------------------------------------------------------------------------|-------------------|------------------|---------|-------------------|-----------------|---------|------------------|---------|
|                                                                                     | Tree Nuts Group   |                  |         | CHO Group         |                 |         | Treatment Effect |         |
|                                                                                     | Baseline          | Change           | P-value | Baseline          | Change          | P-value | Mean Difference  | P-value |
| Total Amount (g)                                                                    | 3439.66 ± 1588.84 | -377.45 ± 376.80 | 0.33    | 3256.45 ± 1367.81 | 213.18 ± 405.25 | 0.61    | 590.63 ± 565.01  | 0.29    |
| Energy (kcal)                                                                       | 2491.77 ± 808.16  | -169.49 ± 237.69 | 0.49    | 2473.52 ± 660.18  | 19.72 ± 153.35  | 0.90    | 189.20 ± 272.83  | 0.49    |
| Carbohydrate (% kcal)                                                               | 44.66 ± 9.90      | -13.95 ± 3.67    | 0.002   | 46.70 ± 9.99      | 0.21 ± 2.49     | 0.93    | 14.16 ± 4.30     | 0.002   |
| Fat (% kcal)                                                                        | 33.63 ± 4.12      | 13.03 ± 2.79     | <0.001  | 32.76 ± 4.55      | 0.27 ± 1.83     | 0.88    | 12.75 ± 3.22     | <0.001  |
| Protein (% kcal)                                                                    | 18.91 ± 6.10      | 0.52 ± 2.29      | 0.82    | 18.94 ± 6.93      | -0.01 ± 1.51    | 0.99    | 0.53 ± 2.65      | 0.84    |
| Animal protein (g)                                                                  | 82.33 ± 52.67     | 0.01 ± 17.99     | 0.99    | 74.42 ± 40.11     | 1.63 ± 11.43    | 0.89    | 1.62 ± 20.52     | 0.94    |
| Vegetable protein (g)                                                               | 29.71 ± 13.50     | -1.39 ± 3.83     | 0.72    | 34.69 ± 15.32     | -1.25 ± 4.32    | 0.78    | 0.14 ± 5.78      | 0.98    |
| Saturated Fat (g)                                                                   | 30.23 ± 18.95     | 0.21 ± 4.64      | 0.96    | 30.79 ± 13.79     | -2.24 ± 4.08    | 0.59    | 2.45 ± 6.17      | 0.69    |
| MonoUnsaturated Fat (g)                                                             | 28.75 ± 12.29     | 28.77 ± 9.83     | 0.01    | 29.99 ± 10.36     | -1.09 ± 3.52    | 0.76    | 29.68 ± 9.61     | 0.007   |
| PolyUnsaturated Fat (g)                                                             | 21.59 ± 6.70      | 5.30 ± 3.25      | 0.12    | 20.09 ± 5.69      | 4.11 ± 2.45     | 0.11    | 1.19 ± 3.99      | 0.77    |
| Saturated Fat (% kcal)                                                              | 10.48 ± 3.62      | 1.09 ± 3.78      | 0.27    | 10.86 ± 2.89      | 1.00 ± 1.02     | 0.34    | 0.09 ± 1.39      | 0.51    |
| MonoUnsaturated Fat (% kcal)                                                        | 10.23 ± 2.45      | 10.81 ± 2.06     | <0.001  | 10.77 ± 2.60      | 0.08 ± 0.81     | 0.93    | 10.73 ± 2.05     | <0.001  |
| PolyUnsaturated Fat (% kcal)                                                        | 7.90 ± 1.91       | 2.31 ± 0.88      | 0.02    | 7.29 ± 1.63       | 0.93 ± 0.63     | 0.16    | 1.37 ± 1.06      | 0.20    |
| Omega-3 Fats (g)                                                                    | 2.11 ± 0.88       | 0.51 ± 0.48      | 0.31    | 2.31 ± 0.78       | 0.23 ± 0.30     | 0.46    | 0.28 ± 0.55      | 0.62    |
| Sucrose (g)                                                                         | 43.76 ± 45.87     | -17.75 ± 8.02    | 0.04    | 41.51 ± 32.31     | -1.57 ± 7.76    | 0.84    | 16.18 ± 11.26    | 0.01    |
| Starch (g)                                                                          | 128.54 ± 40.86    | -49.84 ± 16.17   | 0.01    | 142.88 ± 40.66    | 0.10 ± 10.46    | 0.99    | 49.94 ± 18.58    | 0.01    |
| Total Fiber (g)                                                                     | 21.19 ± 10.64     | -0.62 ± 3.40     | 0.86    | 22.84 ± 6.64      | 1.05 ± 2.42     | 0.67    | 1.67 ± 4.06      | 0.68    |
| Soluble Fiber (g)                                                                   | 6.71 ± 3.78       | -1.26 ± 1.29     | 0.34    | 7.99 ± 3.46       | -0.35 ± 0.95    | 0.72    | 0.91 ± 1.57      | 0.57    |
| Insoluble Fiber (g)                                                                 | 13.89 ± 7.80      | 1.19 ± 2.49      | 0.64    | 14.65 ± 4.92      | 0.62 ± 1.71     | 0.72    | 0.57 ± 2.94      | 0.85    |
| Pectins (g)                                                                         | 1.64 ± 1.22       | 2.01 ± 0.46      | <0.001  | 2.22 ± 1.19       | 0.26 ± 0.35     | 0.47    | 1.75 ± 0.57      | 0.004   |
| Total Sugars (g)                                                                    | 95.51 ± 68.96     | -31.92 ± 14.71   | 0.04    | 101.03 ± 57.42    | -6.32 ± 9.45    | 0.51    | 25.60 ± 16.86    | 0.04    |
| Added Sugars (g)                                                                    | 61.60 ± 56.59     | -24.85 ± 10.36   | 0.03    | 64.74 ± 54.65     | -10.11 ± 11.80  | 0.40    | 14.74 ± 16.13    | 0.05    |
| Refined Grains (oz eq)                                                              | 6.98 ± 3.05       | -2.51 ± 0.99     | 0.02    | 7.86 ± 3.89       | -0.54 ± 1.05    | 0.61    | 1.97 ± 1.47      | 0.19    |
| Sodium (mg)                                                                         | 4083.06 ± 1282.08 | -392.14 ± 658.09 | 0.56    | 4574.82 ± 1866.17 | 18.86 ± 605.61  | 0.98    | 411.01 ± 897.26  | 0.65    |

| Supplemental Table. Changes in Dietary Energy and Nutrient Intakes in Females (n= 48) |                   |                  |         |                   |                  |         |                  |         |
|---------------------------------------------------------------------------------------|-------------------|------------------|---------|-------------------|------------------|---------|------------------|---------|
|                                                                                       | Tree Nuts Group   |                  |         | CHO Group         |                  |         | Treatment Effect |         |
|                                                                                       | Baseline          | Change           | P-value | Baseline          | Change           | P-value | Mean Difference  | P-value |
| Total Amount (g)                                                                      | 3316.08 ± 1569.99 | -564.39 ± 347.81 | 0.12    | 3436.91 ± 1727.01 | -310.07 ± 440.56 | 0.49    | 254.32 ± 558.72  | 0.65    |
| Energy (Kcal)                                                                         | 1956.38 ± 559.59  | 49.51 ± 151.60   | 0.75    | 2205.34 ± 750.40  | 225.41 ± 173.60  | 0.21    | 175.89 ± 229.91  | 0.45    |
| Carbohydrate (% kcal)                                                                 | 49.61 ± 9.52      | -10.88 ± 2.06    | <0.001  | 50.32 ± 6.03      | -7.63 ± 1.84     | <0.001  | 3.25 ± 2.77      | 0.25    |
| Fat (% kcal)                                                                          | 34.56 ± 8.21      | 8.55 ± 1.86      | <0.001  | 35.04 ± 5.73      | 3.69 ± 1.79      | 0.05    | 4.86 ± 2.58      | 0.05    |
| Protein (% kcal)                                                                      | 15.36 ± 5.81      | 0.30 ± 1.30      | 0.82    | 14.11 ± 4.40      | 2.37 ± 1.07      | 0.03    | 2.07 ± 1.69      | 0.23    |
| Animal protein (g)                                                                    | 45.47 ± 29.25     | -2.37 ± 7.38     | 0.75    | 43.44 ± 19.82     | 21.19 ± 6.89     | 0.01    | 23.56 ± 10.12    | 0.01    |
| Vegetable protein (g)                                                                 | 27.62 ± 10.65     | 4.47 ± 2.43      | 0.07    | 32.12 ± 14.13     | -1.52 ± 3.38     | 0.66    | 5.99 ± 4.13      | 0.15    |
| Saturated fat (g)                                                                     | 22.94 ± 10.50     | -0.27 ± 2.44     | 0.91    | 28.28 ± 17.67     | 5.25 ± 4.72      | 0.28    | 5.52 ± 5.25      | 0.29    |
| MonoUnsaturated Fat (g)                                                               | 25.34 ± 10.56     | 16.22 ± 3.23     | <0.001  | 27.77 ± 12.06     | 7.05 ± 14.85     | 0.03    | 9.17 ± 4.48      | 0.02    |
| PolyUnsaturated Fat (g)                                                               | 18.30 ± 10.67     | 7.55 ± 1.88      | <0.001  | 22.08 ± 9.58      | 5.28 ± 3.47      | 0.14    | 2.27 ± 3.89      | 0.56    |
| Saturated Fat (% kcal)                                                                | 10.15 ± 3.50      | -0.17 ± 3.66     | 0.83    | 10.91 ± 3.74      | 0.79 ± 5.31      | 0.48    | 0.95 ± 1.32      | 0.48    |

|                                        |                   |                     |        |                      |                     |      |                 |        |
|----------------------------------------|-------------------|---------------------|--------|----------------------|---------------------|------|-----------------|--------|
| <b>MonoUnsaturated Fat</b><br>(% kcal) | 11.35 ± 4.43      | 7.18 ± 1.27         | <0.001 | 11.10 ± 2.43         | 1.43 ± 0.63         | 0.03 | 5.75 ± 1.43     | <0.001 |
| <b>PolyUnsaturated Fat</b><br>(% kcal) | 7.83 ± 3.36       | 3.36 ± 0.78         | <0.001 | 8.92 ± 2.81          | 1.02 ± 1.05         | 0.34 | 2.34 ± 1.30     | 0.05   |
| <b>Omega-3 FA (g)</b>                  | 2.28 ± 1.97       | 0.50 ± 0.29         | 0.10   | 2.64 ± 1.17          | 0.23 ± 0.43         | 0.60 | 0.27 ± 0.52     | 0.61   |
| <b>Sucrose (g)</b>                     | 39.37 ± 21.14     | -5.94 ± 6.12        | 0.34   | 47.75 ± 34.47        | -8.38 ± 8.05        | 0.31 | 2.44 ± 10.06    | 0.81   |
| <b>Starch (g)</b>                      | 118.68 ± 56.69    | -26.43 ± 11.09      | 0.03   | 141.63 ± 59.38       | -25.15 ± 16.66      | 0.15 | 1.28 ± 19.85    | 0.95   |
| <b>Total Fiber (g)</b>                 | 21.24 ± 7.84      | 0.21 ± 2.03         | 0.92   | 25.49 ± 9.87         | -2.30 ± 2.55        | 0.38 | 2.51 ± 3.25     | 0.44   |
| <b>Soluble Fiber (g)</b>               | 6.61 ± 2.80       | -0.83 ± 0.65        | 0.21   | 7.34 ± 2.82          | -0.74 ± 0.70        | 0.30 | 0.09 ± 0.96     | 0.93   |
| <b>Insoluble Fiber (g)</b>             | 14.04 ± 5.98      | 1.29 ± 1.61         | 0.43   | 17.61 ± 8.65         | -1.92 ± 2.06        | 0.36 | 3.20 ± 2.60     | 0.22   |
| <b>Pectins (g)</b>                     | 2.63 ± 1.39       | 1.03 ± 0.40         | 0.02   | 2.85 ± 1.90          | -0.06 ± 0.55        | 0.91 | 1.09 ± 0.68     | 0.05   |
| <b>Total Sugars (g)</b>                | 83.44 ± 32.37     | -20.05 ± 7.10       | 0.01   | 93.32 ± 50.35        | 0.24 ± 12.56        | 0.99 | 20.29 ± 14.27   | 0.01   |
| <b>Added Sugars (g)</b>                | 50.06 ± 26.54     | -5.35 ± 6.67        | 0.43   | 59.50 ± 44.16        | -4.63 ± 11.54       | 0.69 | 0.72 ± 13.19    | 0.95   |
| <b>Refined Grains (oz eq)</b>          | 5.93 ± 3.70       | -1.74 ± 0.77        | 0.03   | 6.24 ± 3.75          | -0.76 ± 0.92        | 0.42 | 0.98 ± 1.20     | 0.42   |
| <b>Sodium (mg)</b>                     | 3254.98 ± 1225.87 | -424.08 ±<br>285.20 | 0.05   | 4069.82 ±<br>2097.62 | -168.63 ±<br>356.15 | 0.64 | 255.45 ± 454.31 | 0.58   |
